# Supplementary material for: Effect of Graphene Oxide-Modified CaAl-Layered Double Hydroxides on the Carbon Dioxide Permeation Properties of Fluoroelastomers
Source: MDPI journal article supplement (doi:10.3390/polym15204151), 2023-10-19
Supplement: s1 [file s1]

## Supplementary File

# Effect of Graphene Oxide-Modified CaAl-Layered Double Hydroxides on the Carbon Dioxide Permeation Properties of Fluoroelastomers

Chuanbo Cong \*, Daigang Peng, Qingkun Liu, Mingyang Yuan, Xiaoyu Meng and Qiong Zhou

New Energy and Material College, China University of Petroleum, Beijing 102249, China;  
pengdg\_123@163.com (D.P.); liuqingkun1992@163.com (Q.L.);  
yuanmy.apply@gmail.com (M.Y.); xymeng800418@sohu.com (X.M.);  
zhouqiong\_cn@163.com (Q.Z.)

\* Correspondence: congcb@cup.edu.com

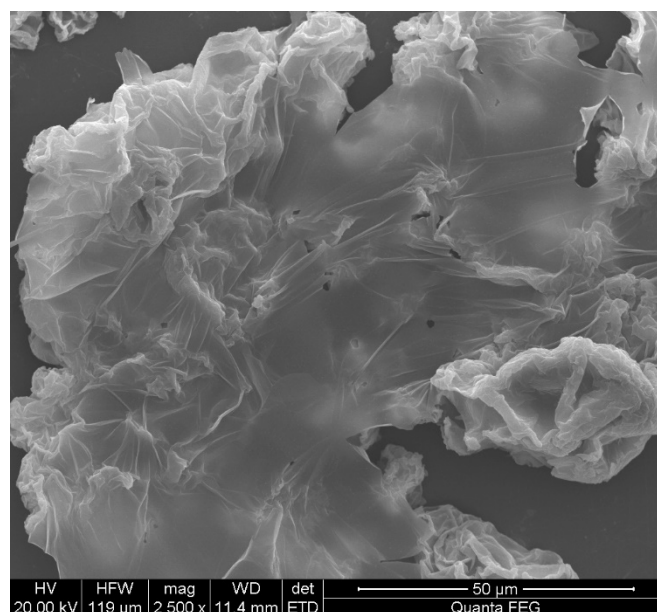

**Figure S1.** SEM images of GO.

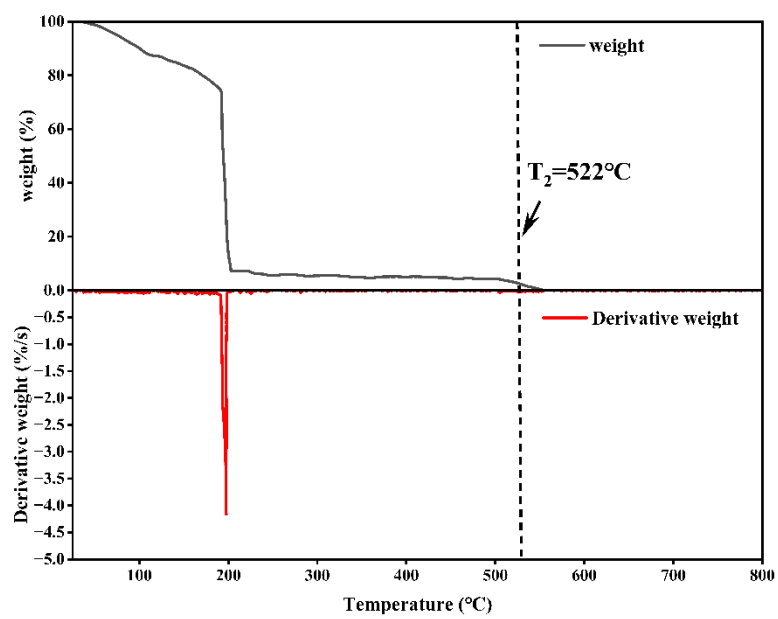

**Figure S2.** TGA-DTG curves of GO.
